# Supplementary material for: High leaf mass per area Oryza genotypes invest more leaf mass to cell wall and show a low mesophyll conductance
Source: PubMed Central journal article supplement (PMC7396964; doi:10.1093/aobpla/plaa028), 2020-06-19
Supplement: plaa028_suppl_supplementary_material.pdf [file plaa028_suppl_supplementary_material.pdf]

## Supplementary data

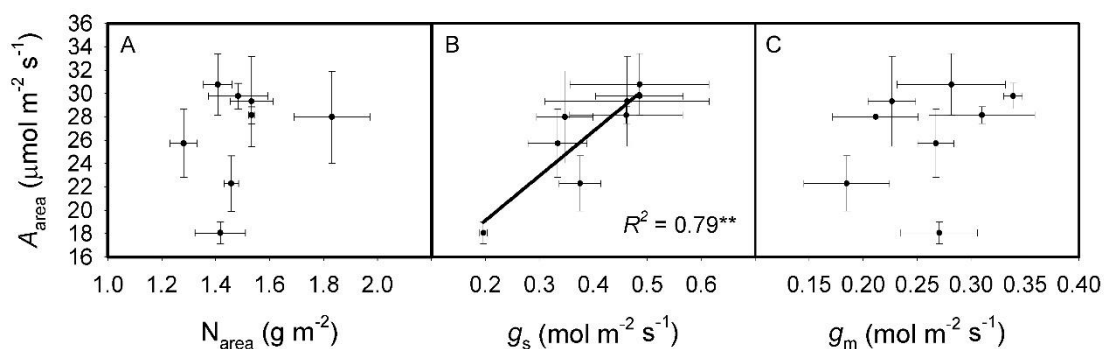

Fig. S1. The relationships between area-based leaf photosynthetic rate ( $A_{\text{area}}$ ) and area-based leaf nitrogen content ( $N_{\text{area}}$ , A), stomatal conductance ( $g_s$ , B) and mesophyll conductance ( $g_m$ , C) across the 8 rice genotypes. Data are means  $\pm$  SD of 3 replicates.

\*,  $P < 0.05$ ; \*\*,  $P < 0.01$ ; \*\*\*,  $P < 0.001$ .

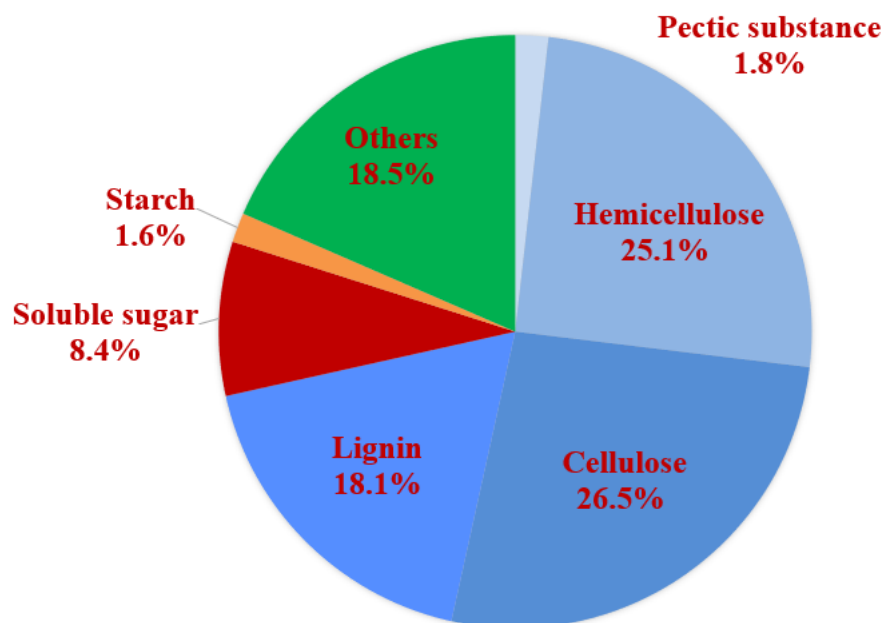

Fig. S2. Percentages of leaf chemical compositions to leaf dry mass in the 8 rice genotypes.

Table S1 Leaf chemical composition per unit leaf mass in eight rice genotypes.

| Genotype       | Pectic substance (mg g <sup>-1</sup> ) | Hemicellulose (mg g <sup>-1</sup> ) | Cellulose (mg g <sup>-1</sup> ) | Lignin (mg g <sup>-1</sup> ) | Cell wall (mg g <sup>-1</sup> ) | Soluble sugar (mg g <sup>-1</sup> ) | Starch (mg g <sup>-1</sup> ) | NSC (mg g <sup>-1</sup> ) | Nitrogen (mg g <sup>-1</sup> ) | Chlorophyll (mg g <sup>-1</sup> FW) |
|----------------|----------------------------------------|-------------------------------------|---------------------------------|------------------------------|---------------------------------|-------------------------------------|------------------------------|---------------------------|--------------------------------|-------------------------------------|
| Sab Ini        | 18.9 ± 1.7                             | 209 ± 9.0                           | 225.4 ± 10.5                    | 179.1 ± 5.7                  | 632.6 ± 13.5                    | 77.8 ± 8.3                          | 15.6 ± 2.9                   | 93.5 ± 5.6                | 34.6 ± 3.7                     | 4.5 ± 0.3                           |
| Nucleoryza     | 17.3 ± 0.5                             | 217.1 ± 8.9                         | 233.4 ± 11.9                    | 175.1 ± 6.8                  | 642.9 ± 13.1                    | 88.1 ± 6.5                          | 15.5 ± 1.6                   | 103.6 ± 5.5               | 31.2 ± 1.1                     | 3.3 ± 0.3                           |
| Champa         | 15.4 ± 1.7                             | 242.1 ± 10.0                        | 243.4 ± 3.3                     | 185.0 ± 3.4                  | 685.9 ± 13.2                    | 80.1 ± 5.5                          | 11.7 ± 1.7                   | 91.8 ± 6.0                | 28.5 ± 1.3                     | 3.7 ± 0.4                           |
| Kirmizi Celtik | 15.6 ± 3.8                             | 256.8 ± 13.8                        | 257.1 ± 12.3                    | 184.1 ± 13.2                 | 713.6 ± 32.4                    | 77.8 ± 4.0                          | 13.3 ± 2.1                   | 91.1 ± 2.1                | 28.4 ± 0.8                     | 3.6 ± 0.5                           |
| Huayou 675     | 19.3 ± 0.3                             | 251.8 ± 5.3                         | 292.2 ± 4.2                     | 185.1 ± 14.3                 | 748.4 ± 10.0                    | 63.8 ± 3.8                          | 16.1 ± 0.6                   | 79.9 ± 4.3                | 30.4 ± 1.7                     | 3.4 ± 0.3                           |
| Huanghuazhan   | 19.4 ± 0.2                             | 265.5 ± 2.3                         | 276.3 ± 27.8                    | 183.4 ± 28.0                 | 744.6 ± 45.1                    | 87.8 ± 10.2                         | 22.8 ± 2.1                   | 110.6 ± 12.3              | 26.8 ± 1.4                     | 3.3 ± 0.3                           |
| Teqing         | 19.0 ± 0.5                             | 277.0 ± 3.0                         | 291.5 ± 14.5                    | 183.6 ± 19.7                 | 771.1 ± 33.4                    | 103.4 ± 20.3                        | 16.2 ± 3.7                   | 119.6 ± 19.5              | 30.0 ± 0.7                     | 4.0 ± 0.7                           |
| Yongyou 12     | 18.9 ± 0.8                             | 290.3 ± 3.2                         | 303.7 ± 12.1                    | 169.0 ± 0.2                  | 781.9 ± 14.6                    | 92.4 ± 11.0                         | 17.7 ± 4.1                   | 110.1 ± 10.3              | 20.3 ± 0.6                     | 2.6 ± 0.2                           |
| ANOVA          |                                        |                                     |                                 |                              |                                 |                                     |                              |                           |                                |                                     |
| Average        | 18.0                                   | 251.2                               | 265.4                           | 180.6                        | 715.1                           | 83.9                                | 16.1                         | 100.0                     | 28.8                           | 3.6                                 |
| Genotype       | *                                      | ***                                 | ***                             | ns                           | ***                             | *                                   | *                            | **                        | ***                            | **                                  |

The content of leaf chlorophyll is based on leaf fresh weight, others are based on dry weight. Cell wall compounds include pectic substance, hemicellulose, cellulose and lignin. NSC, Non-structural carbohydrate, includes soluble sugar and Starch. \*,  $P < 0.05$ ; \*\*,  $P < 0.01$ ; \*\*\*,  $P < 0.001$ .

Table S2 Leaf chemical composition per unit leaf area in eight rice genotypes.

| Genotype       | Pectic substance (g m <sup>-2</sup> ) | Hemicellulose (g m <sup>-2</sup> ) | Cellulose (g m <sup>-2</sup> ) | Lignin (g m <sup>-2</sup> ) | Cell wall (g m <sup>-2</sup> ) | Soluble sugar (g m <sup>-2</sup> ) | Starch (g m <sup>-2</sup> ) | NSC (g m <sup>-2</sup> ) | Nitrogen (g m <sup>-2</sup> ) | Chlorophyll (mg m <sup>-2</sup> ) |
|----------------|---------------------------------------|------------------------------------|--------------------------------|-----------------------------|--------------------------------|------------------------------------|-----------------------------|--------------------------|-------------------------------|-----------------------------------|
| Sab Ini        | 1.0 ± 0.1                             | 11.1 ± 0.5                         | 12.0 ± 0.6                     | 9.5 ± 0.3                   | 33.6 ± 0.7                     | 4.1 ± 0.4                          | 0.8 ± 0.2                   | 5.0 ± 0.3                | 1.83 ± 0.14                   | 683 ± 49                          |
| Nucleoryza     | 0.9 ± 0.0                             | 10.7 ± 0.4                         | 11.5 ± 0.6                     | 8.6 ± 0.3                   | 31.6 ± 0.6                     | 4.3 ± 0.3                          | 0.8 ± 0.1                   | 5.1 ± 0.3                | 1.53 ± 0.01                   | 407 ± 38                          |
| Champa         | 0.7 ± 0.1                             | 10.9 ± 0.4                         | 10.9 ± 0.1                     | 8.3 ± 0.2                   | 30.9 ± 0.6                     | 3.6 ± 0.2                          | 0.5 ± 0.1                   | 4.1 ± 0.3                | 1.28 ± 0.05                   | 473 ± 46                          |
| Kirmizi Celtik | 0.8 ± 0.2                             | 12.8 ± 0.7                         | 12.8 ± 0.6                     | 9.2 ± 0.7                   | 35.6 ± 1.6                     | 3.9 ± 0.2                          | 0.7 ± 0.1                   | 4.5 ± 0.1                | 1.42 ± 0.09                   | 518 ± 77                          |
| Huayou 675     | 0.9 ± 0.0                             | 12.3 ± 0.3                         | 14.2 ± 0.2                     | 9.0 ± 0.7                   | 36.5 ± 0.5                     | 3.1 ± 0.2                          | 0.8 ± 0.0                   | 3.9 ± 0.2                | 1.48 ± 0.11                   | 439 ± 35                          |
| Huanghuazhan   | 1.1 ± 0.0                             | 15.2 ± 0.1                         | 15.8 ± 1.6                     | 10.5 ± 1.6                  | 42.7 ± 2.6                     | 5.0 ± 0.6                          | 1.3 ± 0.1                   | 6.3 ± 0.7                | 1.53 ± 0.08                   | 459 ± 38                          |
| Teqing         | 0.9 ± 0.0                             | 13.0 ± 0.1                         | 13.7 ± 0.7                     | 8.6 ± 0.9                   | 36.1 ± 1.6                     | 4.8 ± 1.0                          | 0.8 ± 0.2                   | 5.6 ± 0.9                | 1.41 ± 0.05                   | 498 ± 86                          |
| Yongyou 12     | 1.4 ± 0.1                             | 20.8 ± 0.2                         | 21.8 ± 0.9                     | 12.1 ± 0.0                  | 56.1 ± 1.0                     | 6.6 ± 0.8                          | 1.3 ± 0.3                   | 7.9 ± 0.7                | 1.46 ± 0.03                   | 445 ± 27                          |
| ANOVA          |                                       |                                    |                                |                             |                                |                                    |                             |                          |                               |                                   |
| Average        | 1.0                                   | 13.3                               | 14.1                           | 9.5                         | 37.9                           | 4.4                                | 0.9                         | 5.3                      | 1.49                          | 490                               |
| Genotype       | ***                                   | ***                                | ***                            | ***                         | ***                            | ***                                | ***                         | ***                      | ***                           | ***                               |

Cell wall compounds include pectic substance, hemicellulose, cellulose and lignin. NSC, Non-structural carbohydrate, includes soluble sugar and Starch. \*,  $P < 0.05$ ; \*\*,  $P < 0.01$ ; \*\*\*,  $P < 0.001$ .
